# Supplementary material for: Changes in Micronutrient Intake and Status, Diet Quality and Glucose Tolerance from Preconception to the Second Trimester of Pregnancy
Source: PubMed Central journal article supplement (PMC6412670; doi:10.3390/nu11020460), 2019-02-22
Supplement: nutrients-11-00460-s001.pdf [file nutrients-11-00460-s001.pdf]

**Supplemental table S1.** Micronutrient intake, micronutrient status, diet quality and glucose homeostasis markers of the study population according to measurement moment: preconception (T0), 12 weeks gestation (T1) and 24 weeks gestation (T2).

|                                 | T0<br>N=67   | T1<br>N=53   | T2<br>N=66   | P-value*<br>T0 vs T1 | P-value<br>T0 vs T2 | P-value<br>T1 vs T2 |
|---------------------------------|--------------|--------------|--------------|----------------------|---------------------|---------------------|
| DHD15 score                     | 80.7 (1.6)   | 79.2 (1.8)   | 78.0 (1.6)   | 0.442                | 0.159               | 0.417               |
| Plasma folate (nmol/L)          | 29.3 (2.2)   | 41.1 (2.1)   | 29.7 (2.1)   | <0.001               | 0.8830              | <0.001              |
| Total folate intake (FE µg/d)   | 642.5 (46.5) | 905.2 (49.9) | 680.8 (47.8) | <0.001               | 0.517               | <0.001              |
| - Dietary intake                | 281.5 (10.6) | 283.7 (9.5)  | 285.8 (10.7) | 0.830                | 0.712               | 0.773               |
| - Supplemental intake           | 362.4 (45.1) | 624.8 (47.6) | 395.6 (44.4) | <0.001               | 0.561               | <0.001              |
| Whole blood vitamin B6 (nmol/L) | 89.8 (3.4)   | 88.7 (2.9)   | 80.0 (2.8)   | 0.765                | 0.012               | 0.008               |
| Total vitamin B6 intake (mg/d)  | 3.0 (0.5)    | 3.7 (0.5)    | 3.3 (0.4)    | 0.298                | 0.634               | 0.025               |
| - Dietary intake                | 1.7 (0.1)    | 1.8 (0.1)    | 1.8 (0.1)    | 0.137                | 0.047               | 0.137               |
| - Supplemental intake           | 1.3 (0.4)    | 2.0 (0.6)    | 1.4 (0.4)    | 0.319                | 0.875               | 0.009               |
| Serum vitamin B12 (pmol/L)      | 308.4 (10.8) | 258.3 (11.0) | 210.3 (7.6)  | <0.001               | <0.001              | <0.001              |
| Total vitamin B12 intake (µg/d) | 8.8 (2.4)    | 6.7 (0.7)    | 6.6 (0.7)    | 0.374                | 0.354               | 0.682               |
| - Dietary intake                | 4.3 (0.2)    | 4.3 (0.2)    | 4.4 (0.2)    | 0.840                | 0.617               | 0.431               |
| - Supplemental intake           | 4.4 (2.4)    | 2.5 (0.7)    | 2.2 (0.6)    | 0.432                | 0.354               | 0.239               |
| Serum 25(OH)D (nmol/L)**        | 62.1 (3.0)   | 77.4 (3.1)   | 88.5 (4.2)   | <0.001               | <0.001              | 0.001               |
| Total vitamin D intake (µg/d)   | 7.7 (0.8)    | 10.4 (0.7)   | 8.9 (0.6)    | 0.002                | 0.225               | 0.064               |
| - Dietary intake                | 3.5 (0.2)    | 3.3 (0.2)    | 3.3 (0.2)    | 0.408                | 0.469               | 0.978               |
| - Supplemental intake           | 4.1 (0.8)    | 7.1 (0.7)    | 5.6 (0.6)    | <0.001               | 0.141               | 0.035               |
| Plasma ferritin (µg/L)          | 31.7 (2.2)   | 31.4 (2.5)   | 12.8 (1.2)   | 0.900                | <0.001              | <0.001              |
| Total iron intake (mg/d)        | 14.1 (0.9)   | 19.7 (1.0)   | 19.4 (1.1)   | <0.001               | <0.001              | 0.806               |
| - Dietary intake                | 10.7 (0.3)   | 10.5 (0.3)   | 10.9 (0.3)   | 0.535                | 0.599               | 0.109               |
| - Supplemental intake           | 3.5 (0.8)    | 9.2 (1.0)    | 8.5 (0.9)    | <0.001               | <0.001              | 0.495               |

Values are mean (SEM).

\* P value obtained using LS means to test for difference between measurement moments.

\*\* Adjusted for season.
